# Supplementary material
Source: PubMed Central journal article supplement (PMC3989413)

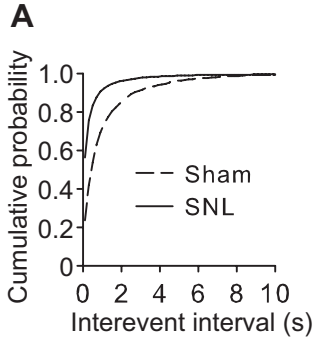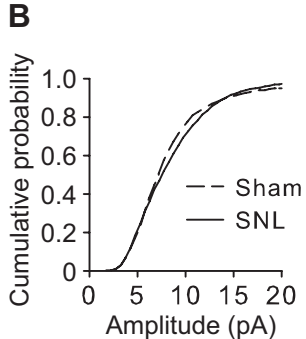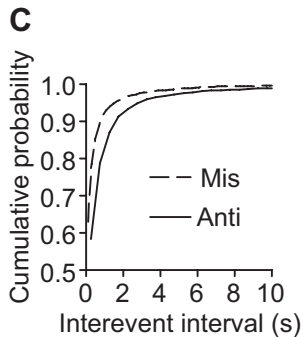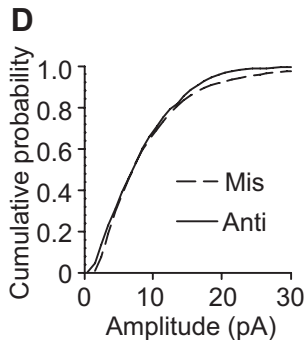

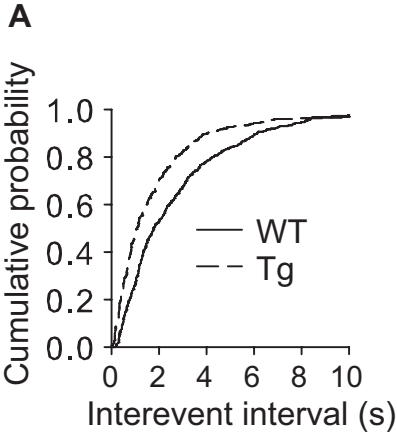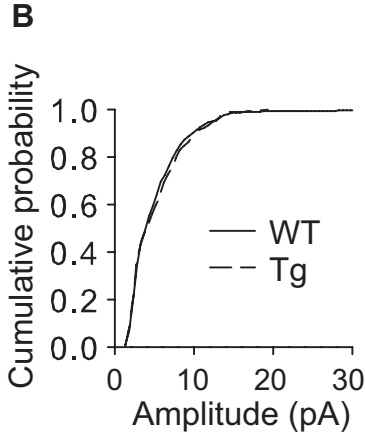

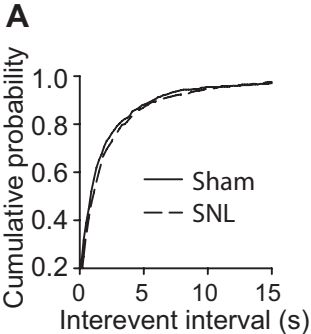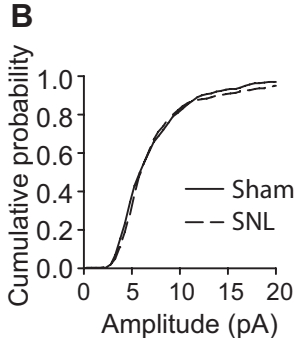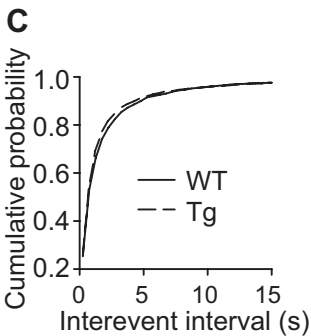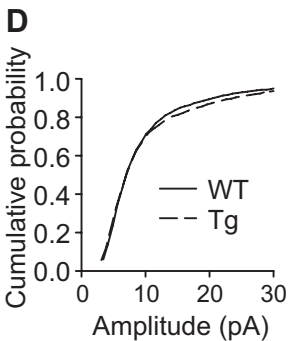

Supplement: NIHMS529142-supplement-Supp_Fig_S1-S3.pdf [file NIHMS529142-supplement-Supp_Fig_S1-S3.pdf]
